# Supplementary material for: Plasma-activated medium suppresses choroidal neovascularization in mice: a new therapeutic concept for age-related macular degeneration
Source: PubMed Central journal article supplement — Sci Rep. 2015 Jan 9;5:7705. doi: 10.1038/srep07705 (PMC4287728; doi:10.1038/srep07705), 2015-01-09
Supplement: srep07705-s1.pdf [file srep07705-s1.pdf]

## Supplementary information

Title:

**Plasma-activated medium suppresses choroidal neovascularization in mice: a new therapeutic concept for age-related macular degeneration**

Authors:

Fuxiang Ye, Hiroki Kaneko, Yosuke Nagasaka, Ryo Ijima, Kae Nakamura,

Masatoshi Nagaya, Kei Takayama, Hiroaki Kajiyama, Takeshi Senga,

Hiromasa Tanaka, Masaaki Mizuno, Fumitaka Kikkawa, Masaru Hori, Hiroko Terasaki

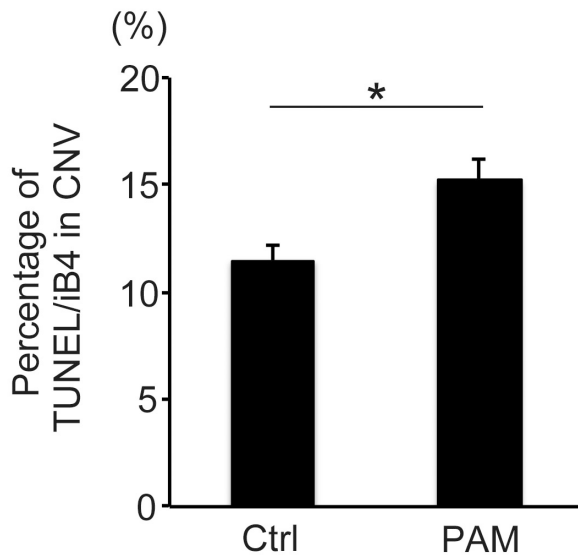

**Supplementary Figure 1 – TUNEL-positive area within CNV area in eyes injected with PAM.**

The percentage of the TUNEL-positive area within the isolectin B4 (iB4)-positive CNV area was calculated in eyes injected with PAM, in comparison with those injected with control PBS. The TUNEL/iB4 percentage was  $11.5 \pm 0.7\%$  (n=8) in control eyes, whereas it was  $15.2 \pm 1.0\%$  (n=8) in PAM-injected eyes. The TUNEL/iB4 percentage was increased by 32% ( $P = 0.012$ ). \* $P < 0.05$ .

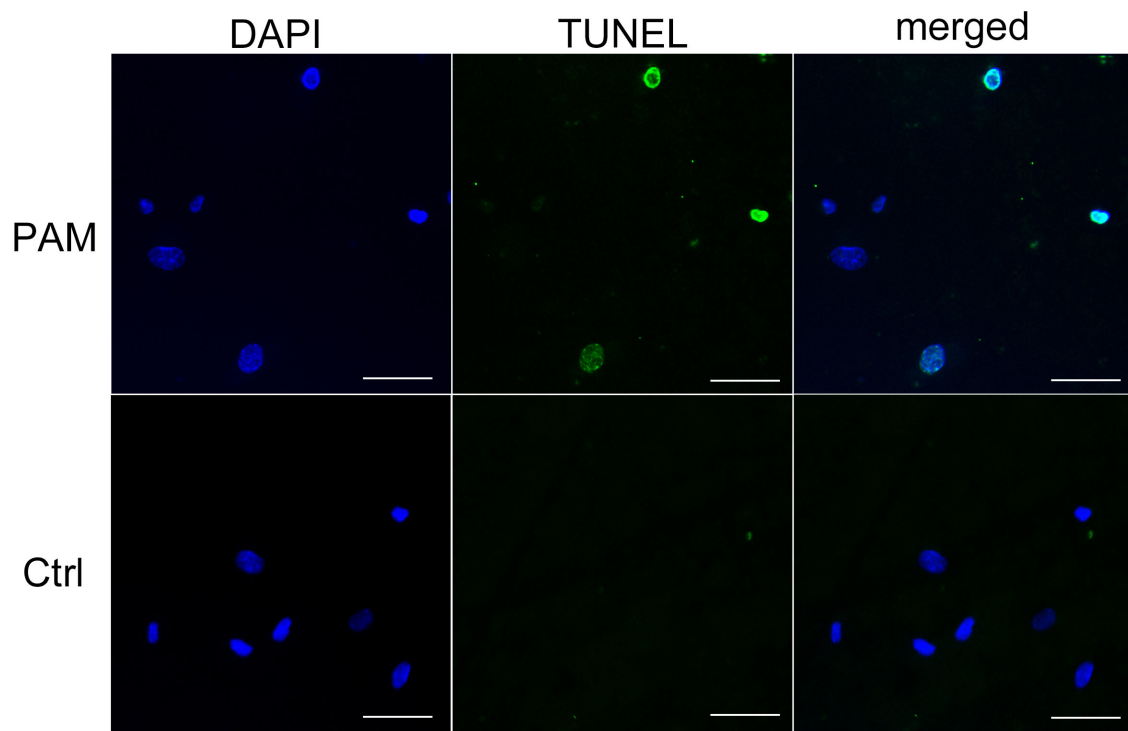

**Supplementary Figure 2 – PAM induced HREC apoptosis**

After 4 h of incubation with PAM, HRECs were fixed in 4% PFA and stained with FITC-TUNEL and DAPI. HRECs treated with PAM showed TUNEL-positivity, whereas HRECs exposed only to control medium did not. Scale bar = 50  $\mu$ m

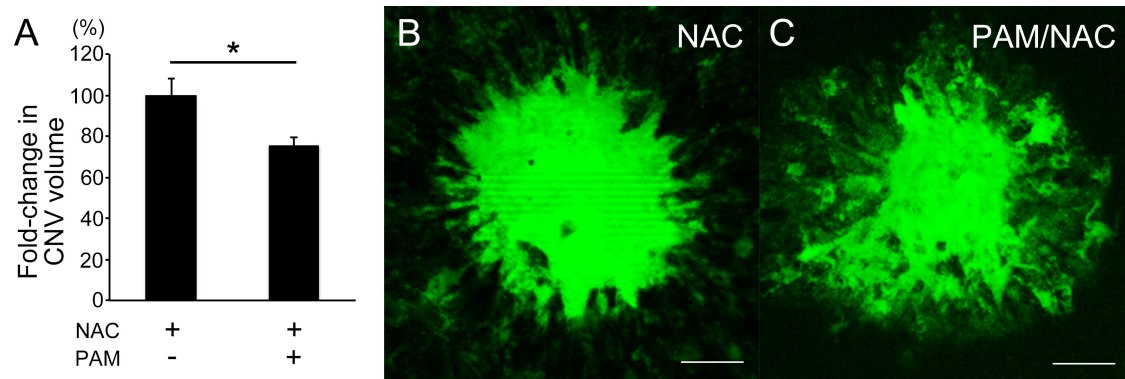

**Supplementary Figure 3 – Laser-CNV comparison in PAM/NAC-injected vs.**

**NAC-injected eyes**

Laser-CNV volume in the eyes injected with PAM/NAC was compared with those injected with PAM only. The CNV volume in eyes injected with PAM and NAC was less than that in eyes injected with NAC only ( $1.00\% \pm 0.08\%$  vs.  $0.75\% \pm 0.04\%$ ,  $P = 0.027$ ,  $n = 18$  and  $17$ , respectively). **(B, C)** Representative images of laser-CNV in NAC-injected (B) and PAM/NAC-injected eyes (C). Scale bar =  $50 \mu\text{m}$ ,  $*P < 0.05$ .

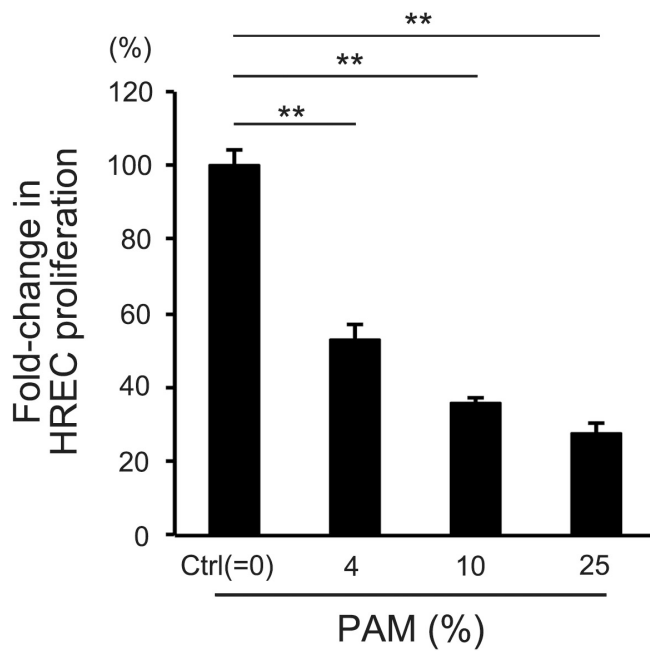

#### Supplementary Figure 4 – Suppressed cell proliferation by PAM

After 4 h of incubation with PAM, the proliferation ability of human retinal endothelial cells (HRECs) was clearly inhibited compared to control ( $P = 6.28 \times 10^{-7}$ , Kruskal–Wallis test). The different concentrations of PAM (4 %, 10 %, and 25 % concentrations) dose dependently inhibited cell proliferation by 47% ( $0.53 \pm 0.04$ ,  $n = 10$ ,  $P = 4.4 \times 10^{-4}$ ) in 4 % PAM, by 64 % ( $0.36 \pm 0.01$ ,  $n = 10$ ,  $P = 4.6 \times 10^{-4}$ ) in 10 % PAM, and by 72 % ( $0.28 \pm 0.03$ ,  $n = 10$ ,  $P = 4.5 \times 10^{-4}$ ) in 25 % PAM compared to the control (=0% PAM) medium ( $1.00 \pm 0.05$ ,  $n = 10$ , Steel’s test).  $**P < 0.01$ .

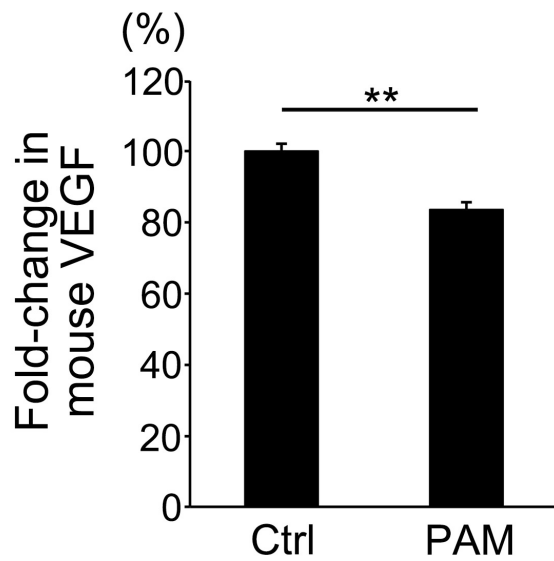

**Supplementary Figure 5 – Reduced mouse VEGF expression in the RPE/choroid complex with CNV after PAM administration**

Three days after the induction of laser-CNV and PAM injection, mouse vascular endothelial growth factor (VEGF) expression in the retinal pigment epithelium (RPE)/choroid complex was measured. Mouse VEGF in the RPE/choroid was reduced by 16% by PAM injection. ( $1.00 \pm 0.22$  vs.  $0.84 \pm 0.24$ ,  $P = 0.0027$ ,  $n = 7$ ).  $**P < 0.01$ .

### **Supplementary Video – Generation of PAM**

Plasma-activated medium (PAM) was generated by exposure to a plasma source placed 2 mm over the PBS or culture medium in all studies.
